# Supplementary material
Source: PubMed Central journal article supplement (PMC3982739)
Supplement: supp_pp.113.231720_231720FigureS1-S13.pdf [file supp_pp.113.231720_231720FigureS1-S13.pdf]

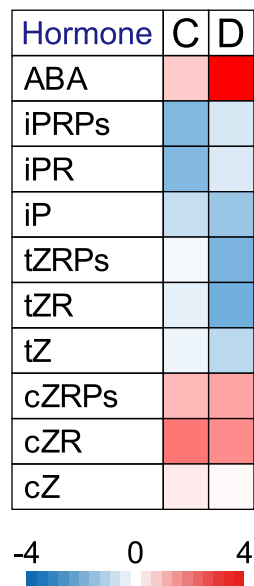

**Figure S1.** Relative levels of ABA and CKs in Arabidopsis plants after cold or dehydration treatments. ABA, abscisic acid; iPRPs, N6-( $\Delta^2$ -isopentenyl) adenine ribotides; iPR, isopentenyladenosine; iP, isopentenyladenine; tZRP, trans-zeatin riboside-5'-phosphates; tZR, trans-zeatin riboside; tZ, trans-zeatin; cZRP, cis-zeatin 5'-phosphates; cZR, cis-zeatin riboside, cZ, cis-zeatin; C, cold; D, dehydration.

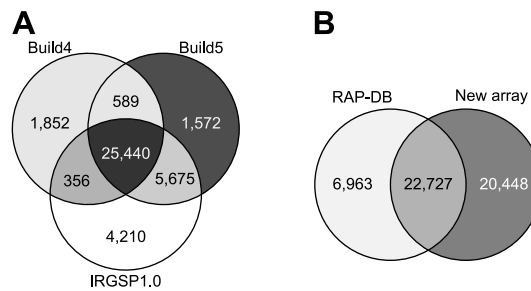

**Figure S2.** Rice genes identified in the rice annotation project database (RAP-DB) and included in our new oligonucleotide microarray. Rice genes in the RAP-DB (Ohyanagi et al., 2006) are classified as being supported by expression evidence (representative genes) or computationally predicted (predicted genes). A comparison of representative genes in IRGSP builds 4 and 5, as well as Os-Nipponbare-Reference-IRGSP-1.0 in RAP-DB, is represented in the Venn diagram. However, IRGSP build 4 was updated to build 5 with 7,247 genes added to, and 2,208 genes deleted from, the RAP-DB. When IRGSP build 5 was subsequently updated to Os-Nipponbare-Reference-IRGSP-1.0, 4,566 genes were added and 2,161 genes were deleted. Among the 4,566 new representative genes, 356 were re-annotated in RAP-DB. (a) Number of rice genes in RAP-DB (build4, build5, and IRGSP1.0). (b) Number of probes in RAP-DB (old microarray) and the new oligonucleotide microarray.

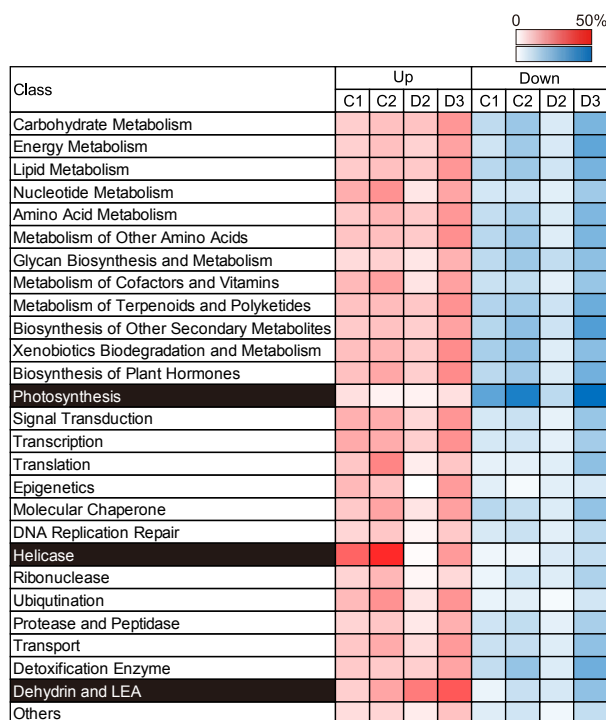

**Figure S3.** Molecular functions of cold-responsive and dehydration-responsive genes in rice plants. Abbreviations O and N denote old and new oligonucleotide microarray, respectively. Heat maps for 27 upregulated (up; red) or downregulated (down; blue) molecular functional classes, indicating the relative abundance (%) of transcripts in cold-treated (C1 and C2) and dehydration-treated (D2 and D3) plants.

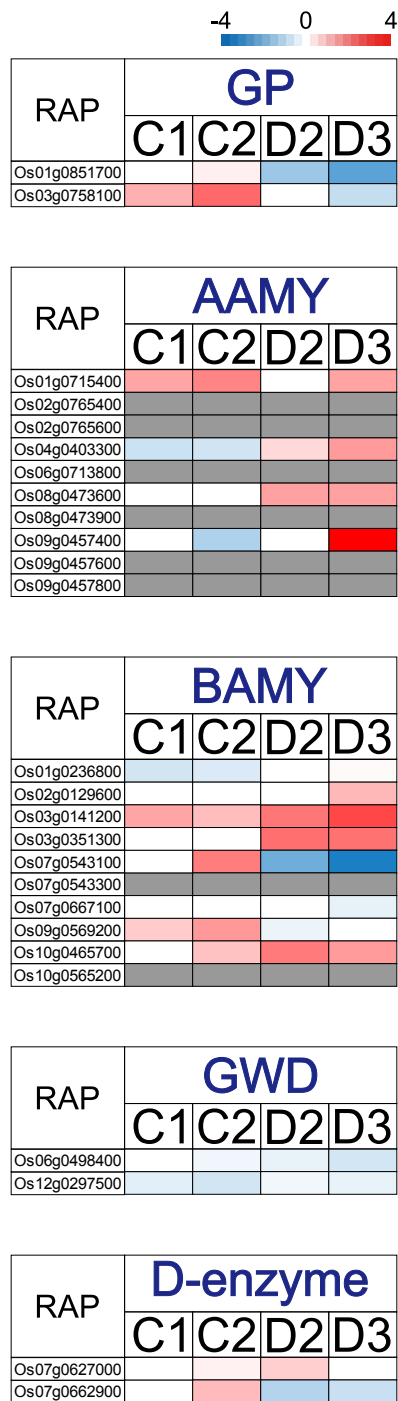

**Figure S4.** Effects of cold or dehydration on transcript levels of genes encoding starch degradation enzymes. Small grey square denotes the absence of a probe for that gene in the oligonucleotide microarray. GP,  $\alpha$ -glucanphosphorylase; AAMY,  $\alpha$ -amylase; BAMY,  $\beta$ -amylase; GWD, glucan water dikina

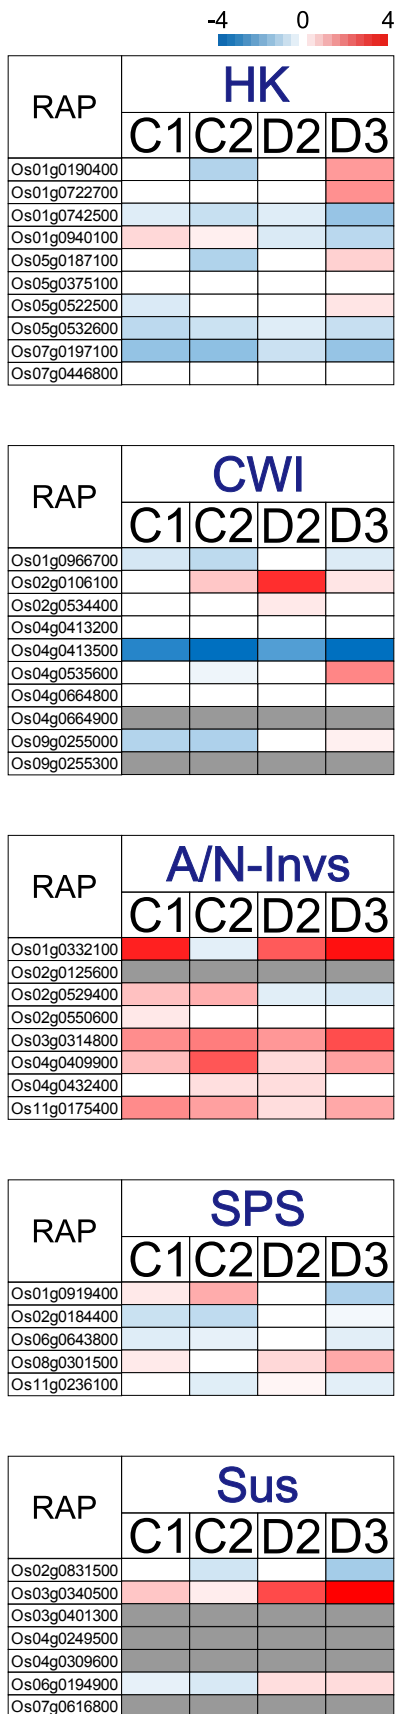

**Figure S5.** Effects of cold or dehydration on transcript levels of genes encoding sucrose metabolism enzymes. Small grey square denotes the absence of a probe for that gene in the oligonucleotide microarray. HK, hexokinase; SPS, sucrose phosphate synthase; Sus, sucrose synthase; A/N-invs, alkaline/neutral invertase; CWI, apoplastic invertase.

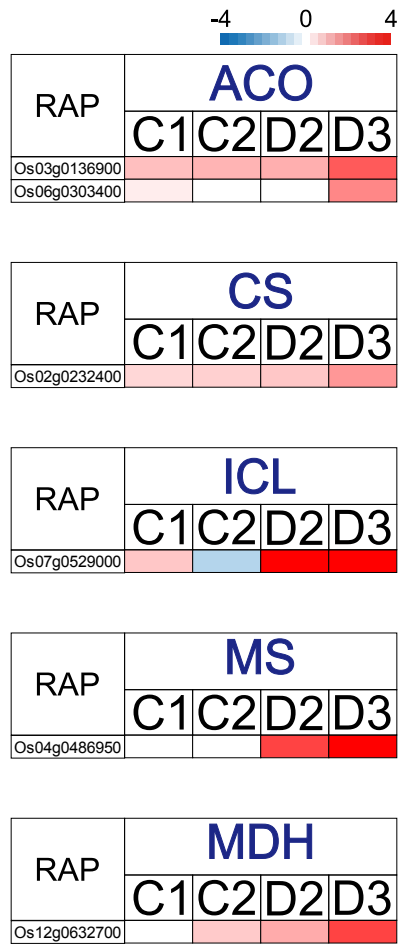

**Figure S6.** Effects of cold or dehydration on transcript levels of genes encoding glyoxylate cycle enzymes. ACO, aconitase hydratase; CS, citrate synthase; ICL, isocitrate lyase; MS, malate synthase; MDH, malate dehydrogenase.

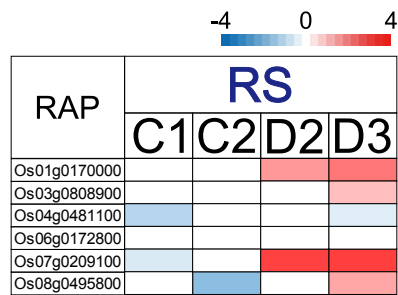

**Figure S7.** Effects of cold or dehydration on transcript levels of genes encoding raffinose biosynthesis enzymes. RS, raffinose synthase.

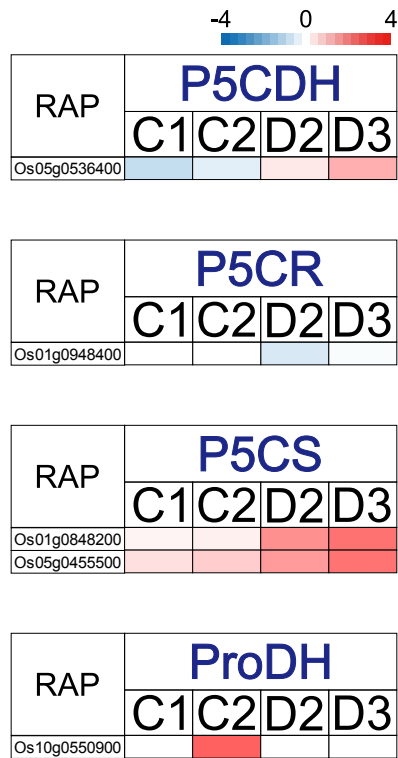

**Figure S8.** Effects of cold or dehydration on transcript levels of genes encoding proline metabolism enzymes. P5CDH,  $\Delta^1$ -pyrroline-5-carboxylate dehydrogenase; P5CS,  $\Delta^1$ -pyrroline-5-carboxylate synthetase; ProDH, proline dehydrogenase; P5CR,  $\Delta^1$ -pyrroline-5-carboxylate reductase.



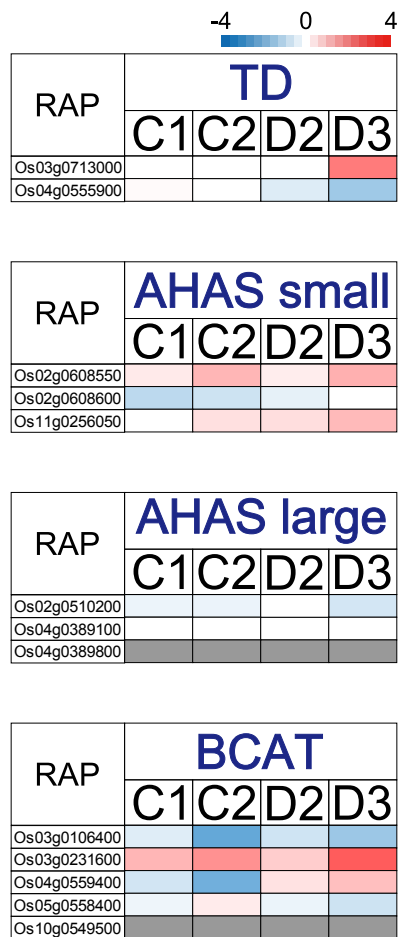

**Figure S9.** Effects of cold or dehydration on transcript levels of genes encoding enzymes related to BCAAs biosynthesis. Small grey square denotes the absence of a probe for that gene in the oligonucleotide microarray. AHAS, acetolactate synthase (small or large subunit); TD, threonine dehydratase; BCAT, branched-chain amino acid aminotransferase.

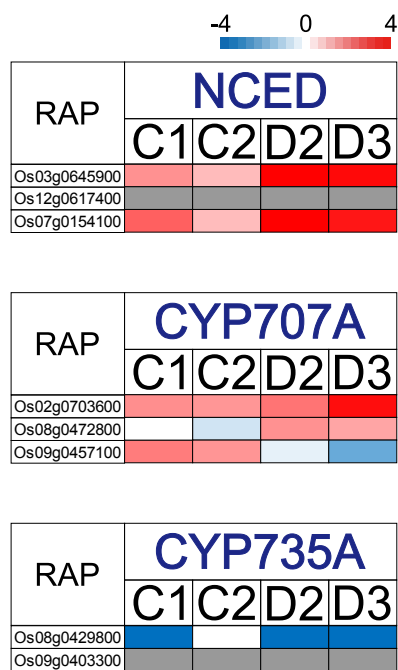

**Figure S10.** Effects of cold or dehydration on transcript levels of representative cold-responsive and dehydration-responsive genes involved in ABA and CK biosyntheses. Small grey square denotes the absence of a probe for that gene in the oligonucleotide microarray. NCED, 9-cis-epoxycarotenoid dioxygenase.

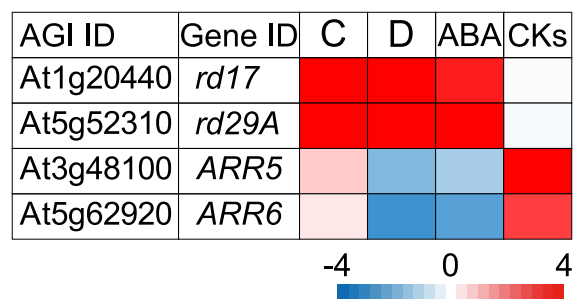

**Figure S11.** Transcript levels of genes encoding *rd17*, *rd29A* and ARR. Heat maps illustrate transcript levels of genes in cold-exposed, dehydration-exposed, ABA-treated, CKs-treated Arabidopsis plants.

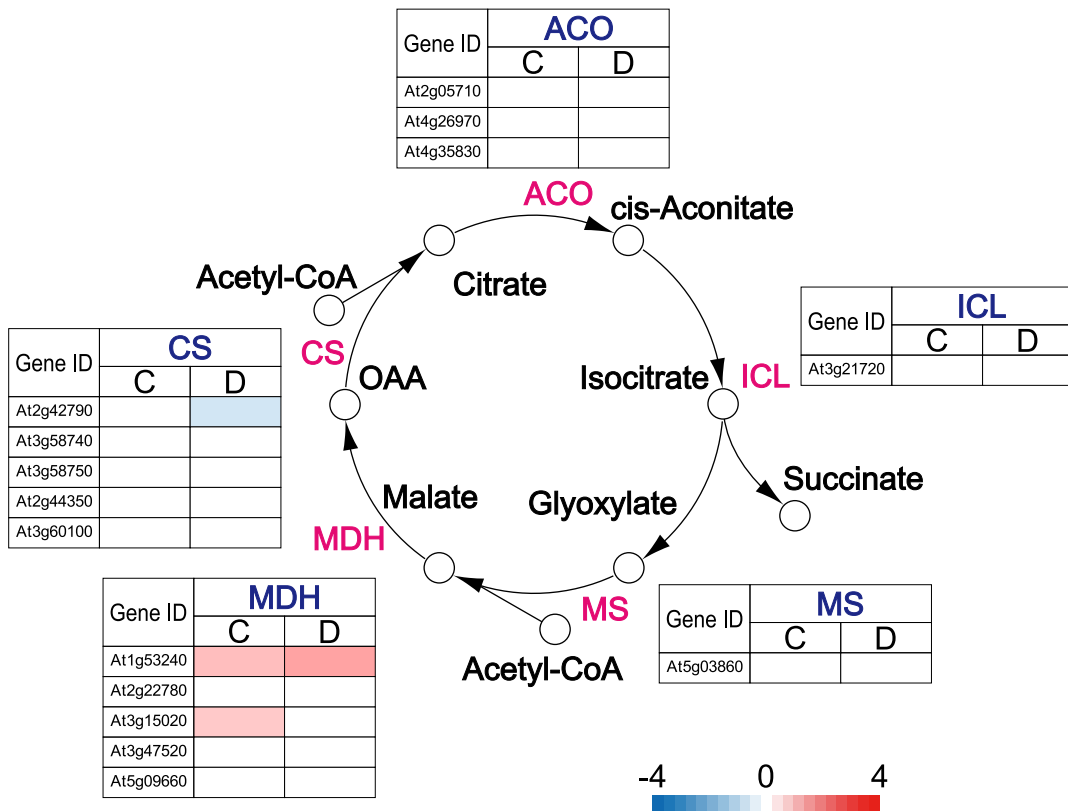

**Figure S12.** Glyoxylate cycle in Arabidopsis plants. Heat maps illustrate transcript levels of representative cold-responsive and dehydration-responsive genes. ACO, aconitase hydratase; ICL, isocitrate lyase; MS, malate synthase; MDH, malate dehydrogenase; CS, citrate synthase.

| Gene ID   | IPT  |      |
|-----------|------|------|
|           | C    | D    |
| At1g68460 | Blue | Red  |
| At2g27760 | Grey | Grey |
| At3g63110 | Blue | Blue |
| At4g24650 | Grey | Grey |
| At5g19040 | Red  | Grey |
| At1g25410 | Grey | Grey |
| At3g23630 | Red  | Red  |
| At3g19160 | Grey | Grey |
| At5g20040 | Blue | Blue |

| Gene ID   | LOG  |      |
|-----------|------|------|
|           | C    | D    |
| At2g28305 | Grey | Grey |
| At2g35990 | Grey | Grey |
| At2g37210 | Red  | Red  |
| At3g53450 | Red  | Grey |
| At4g35190 | Red  | Red  |
| At5g03270 | Grey | Blue |
| At5g06300 | Red  | Red  |
| At5g11950 | Grey | Grey |
| At5g26140 | Grey | Grey |

| Gene ID   | CKX  |      |
|-----------|------|------|
|           | C    | D    |
| At2g41510 | Red  | Blue |
| At2g19500 | Grey | Grey |
| At5g56970 | Grey | Grey |
| At4g29740 | Grey | Blue |
| At1g75450 | Blue | Grey |
| At3g63440 | Blue | Blue |
| At5g21482 | Blue | Grey |

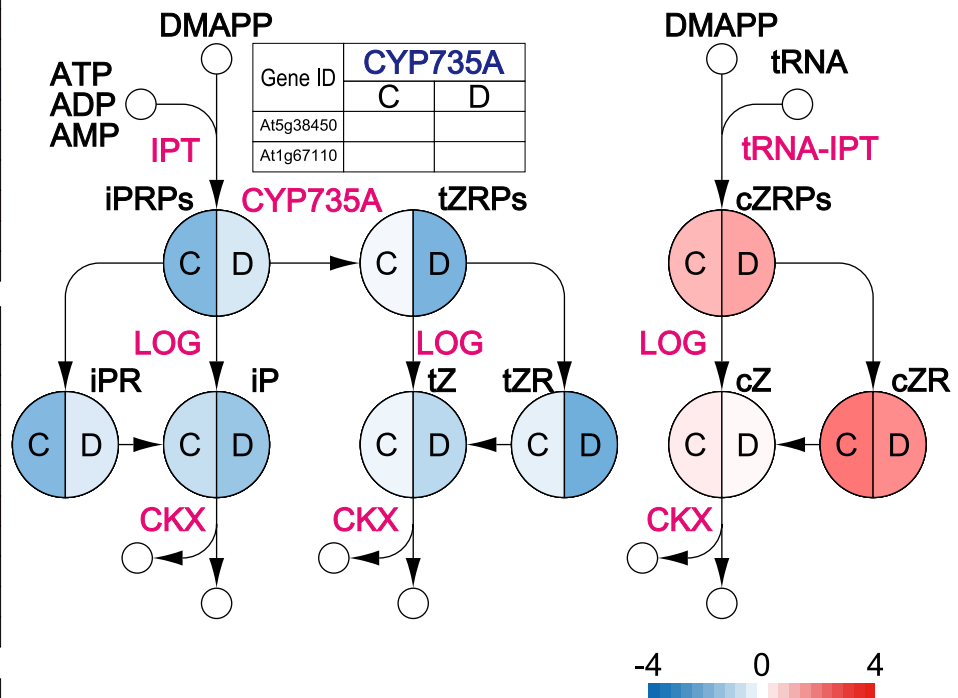

**Figure S13.** CK biosynthesis in Arabidopsis plants. The heat maps illustrate transcript levels of representative cold-responsive and dehydration-responsive genes. Small grey square denotes the absence of a probe in the oligonucleotide microarray for that gene. IPT, adenosine phosphate-isopentenyltransferase; LOG, cytokinin nucleoside 5'-monophosphate phosphoribohydrolase; CKX, cytokinin oxidase/dehydrogenase; tRN-IPT, tRNA isopentenyltransferase.
